# Supplementary figures and images for: HSF-1 activates the ubiquitin proteasome system to promote non-apoptotic developmental cell death in C. elegans
Source: eLife journal article supplement (doi:10.7554/elife.12821), 2016-03-08

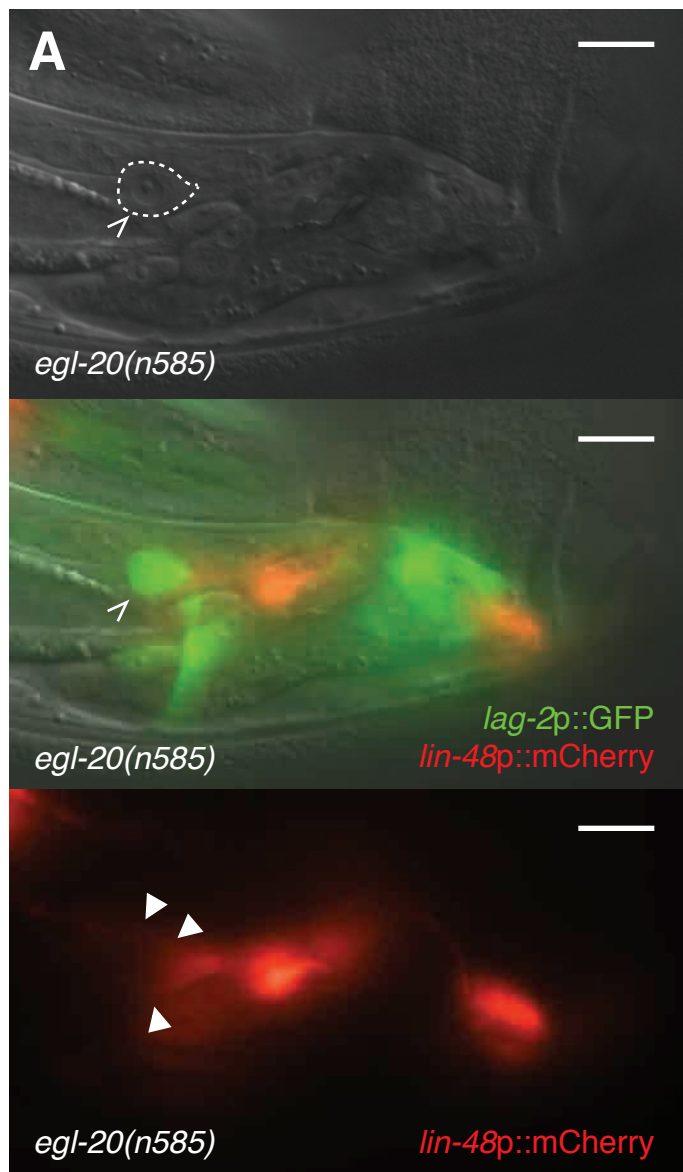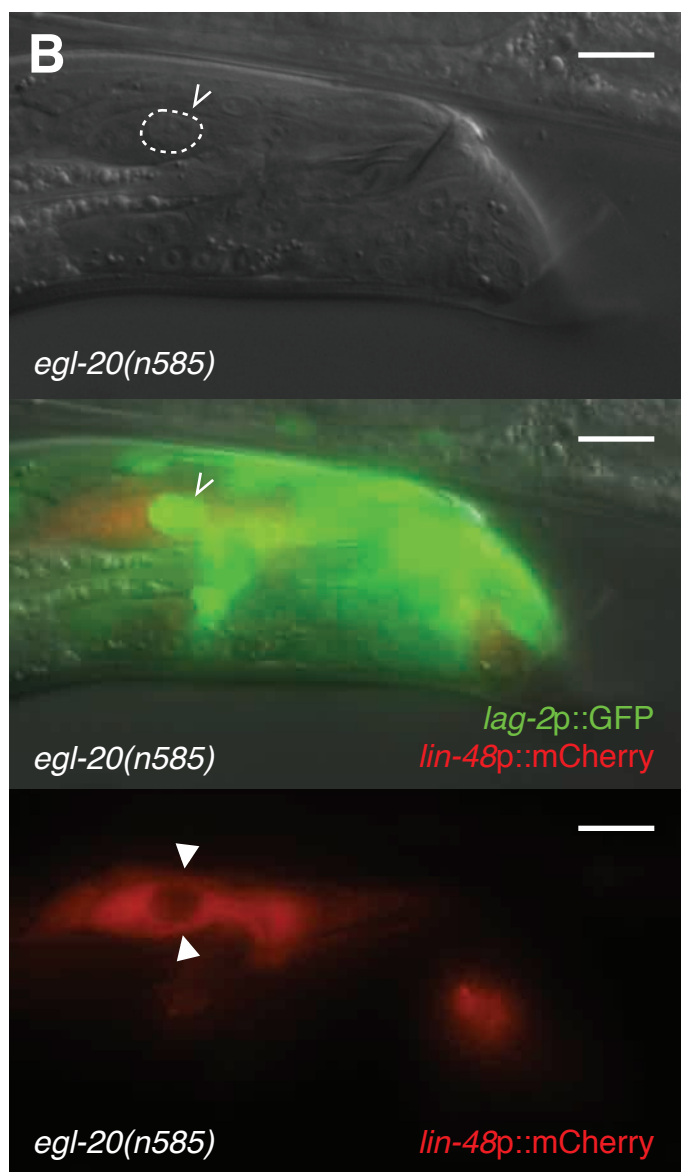

Supplement: supp [file elife-12821-supp-v1.zip]

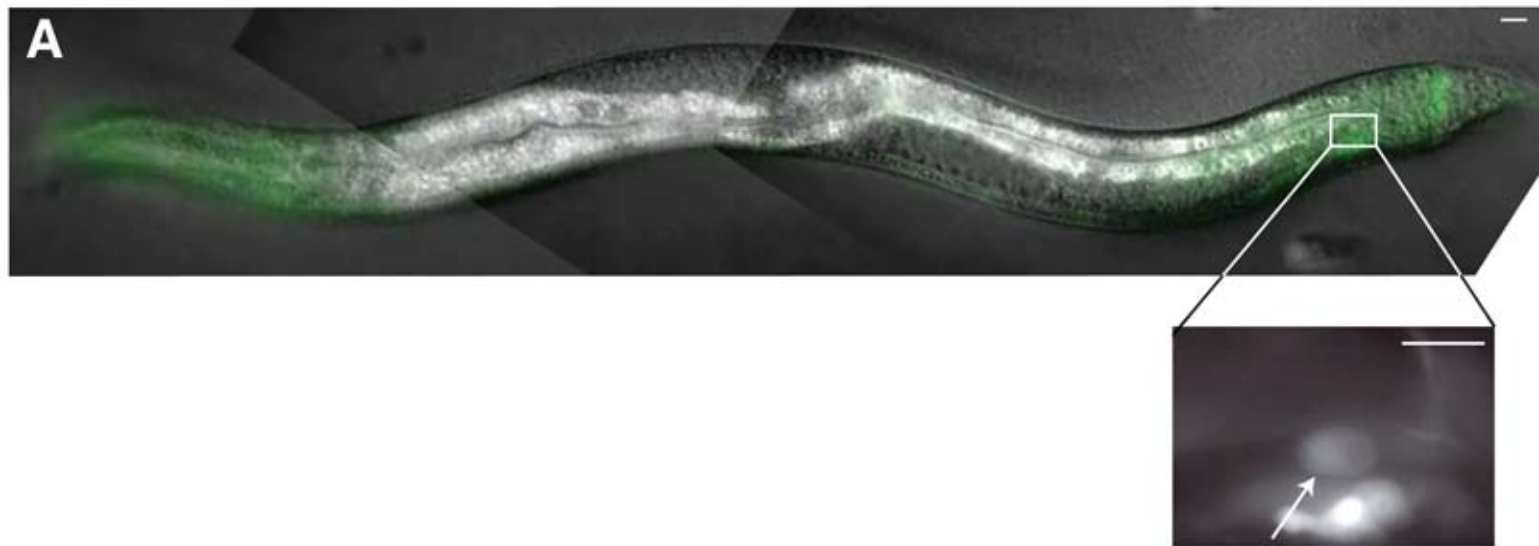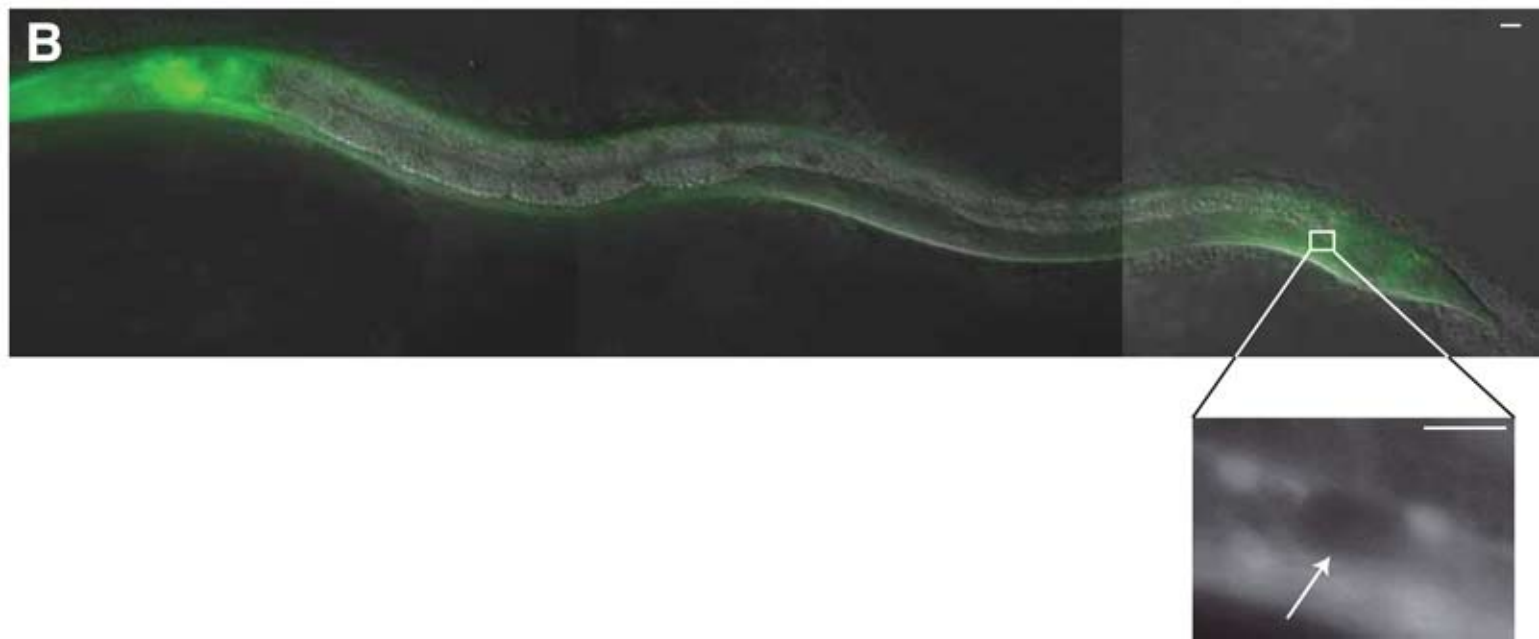

Supplement: supp [file elife-12821-supp-v1.zip]

**A**

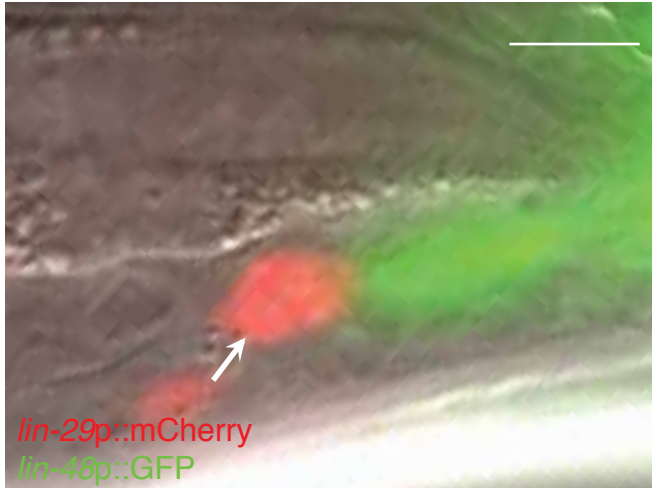

**B**

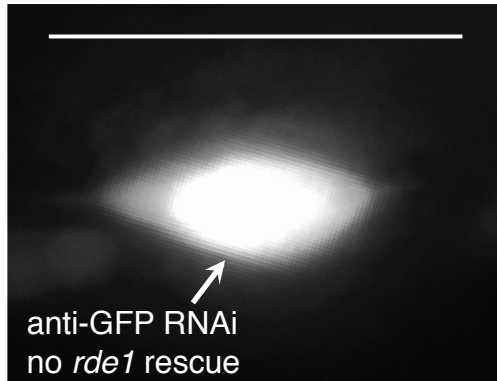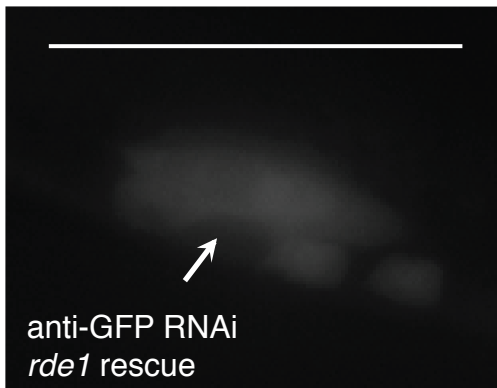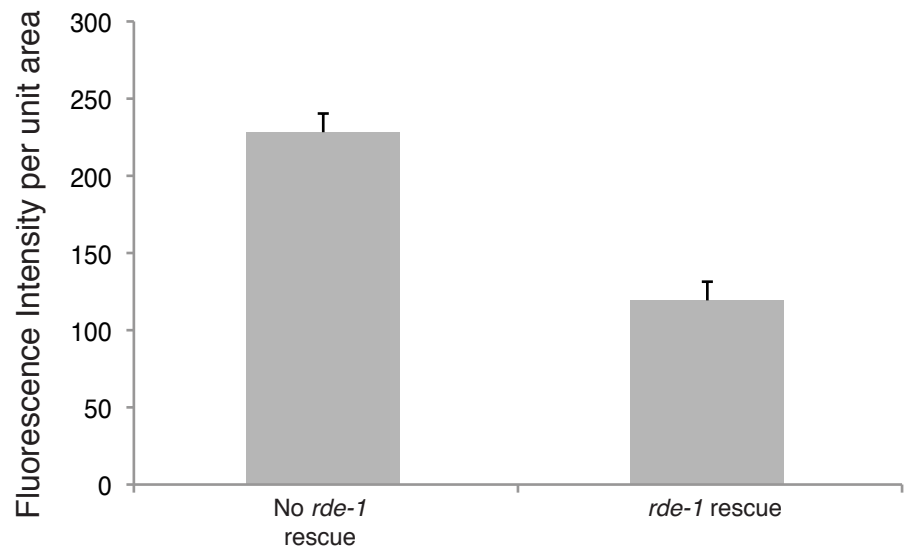

Supplement: supp [file elife-12821-supp-v1.zip]

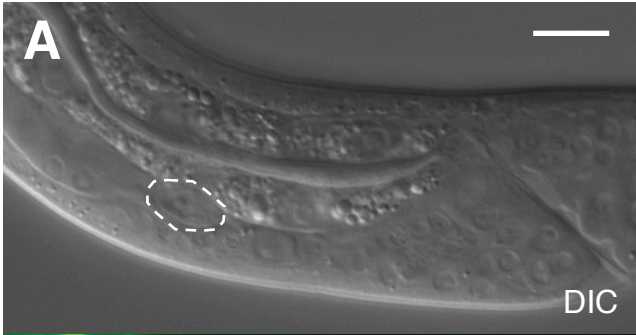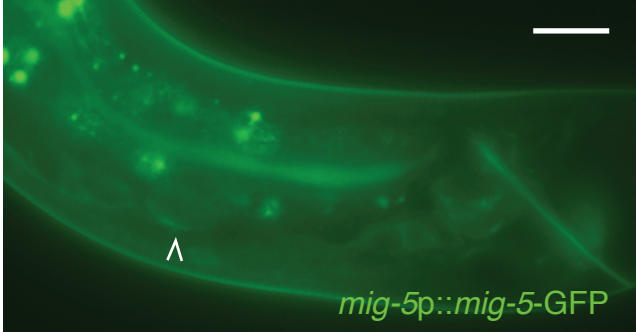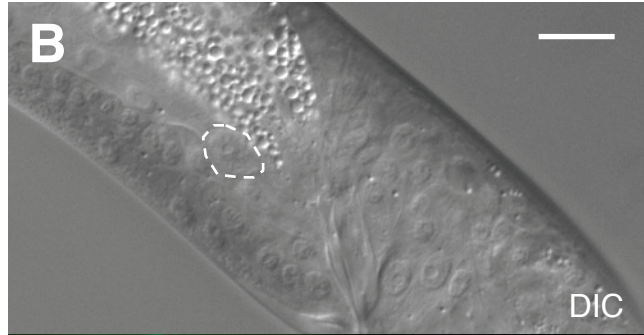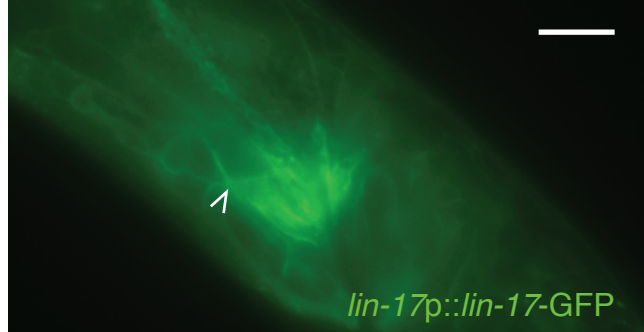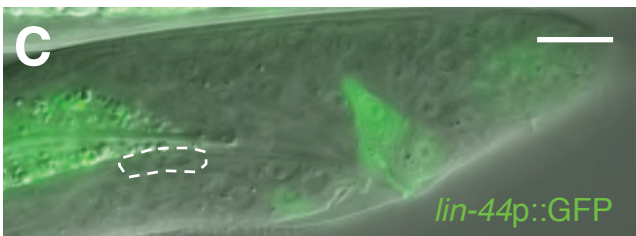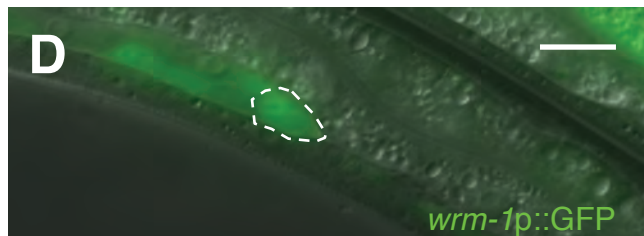

Supplement: supp [file elife-12821-supp-v1.zip]

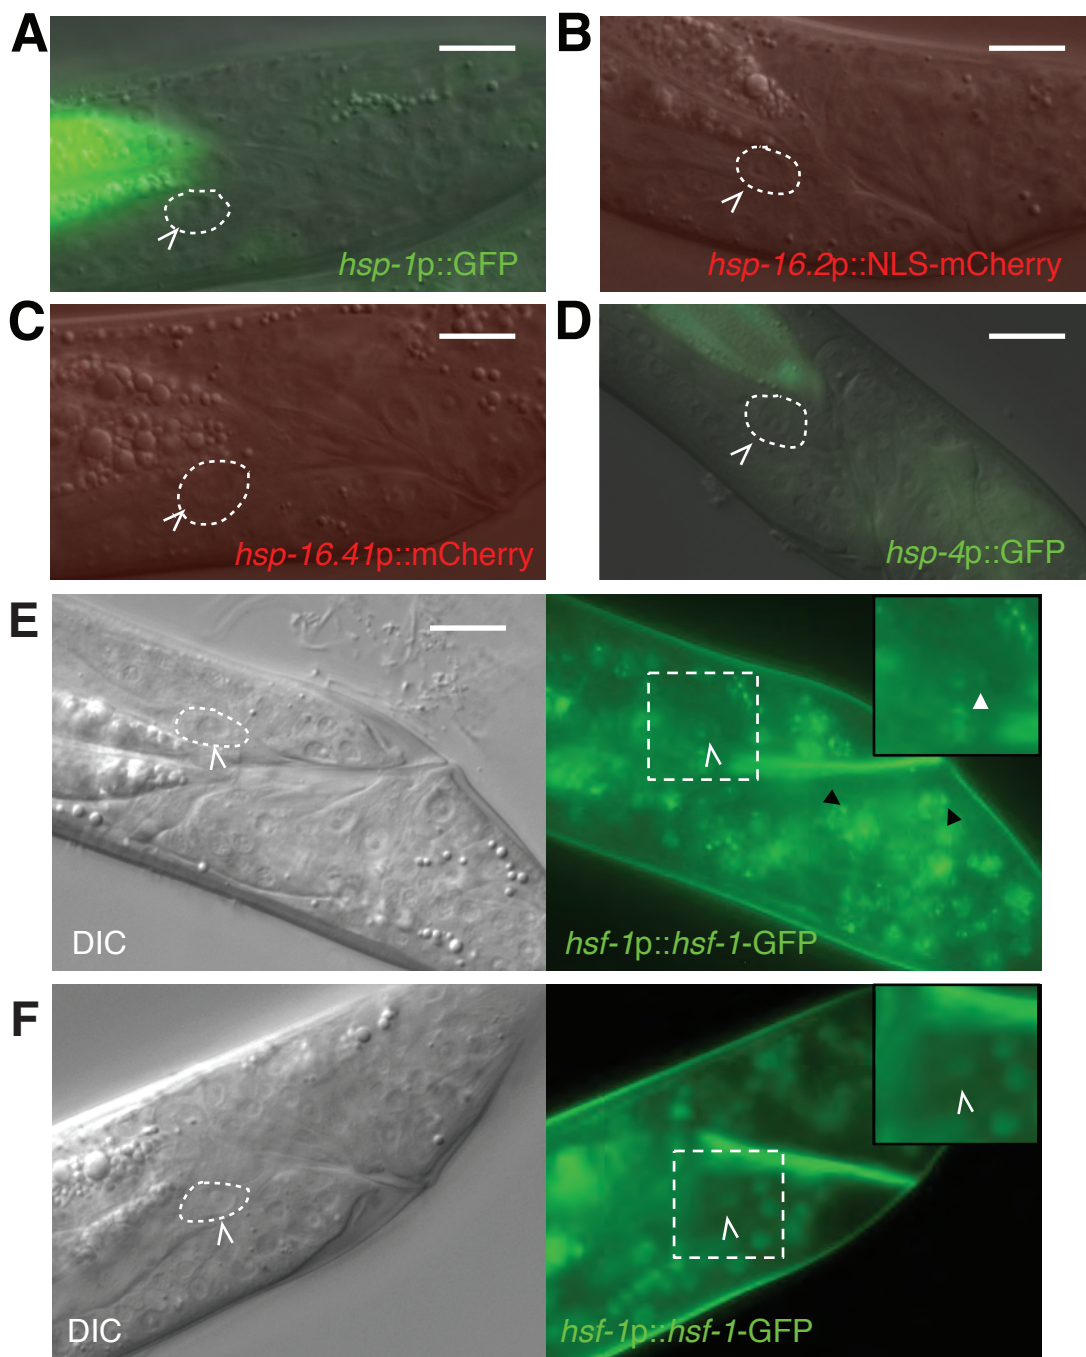

Supplement: supp [file elife-12821-supp-v1.zip]

A

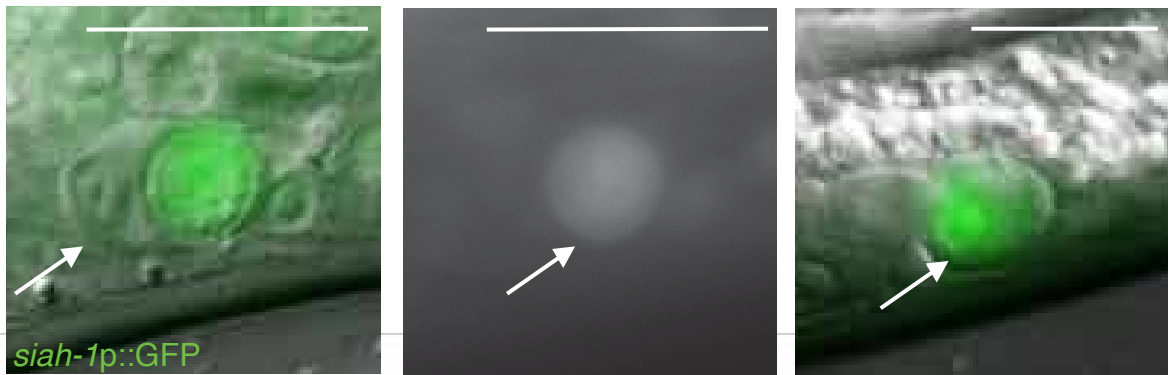

B

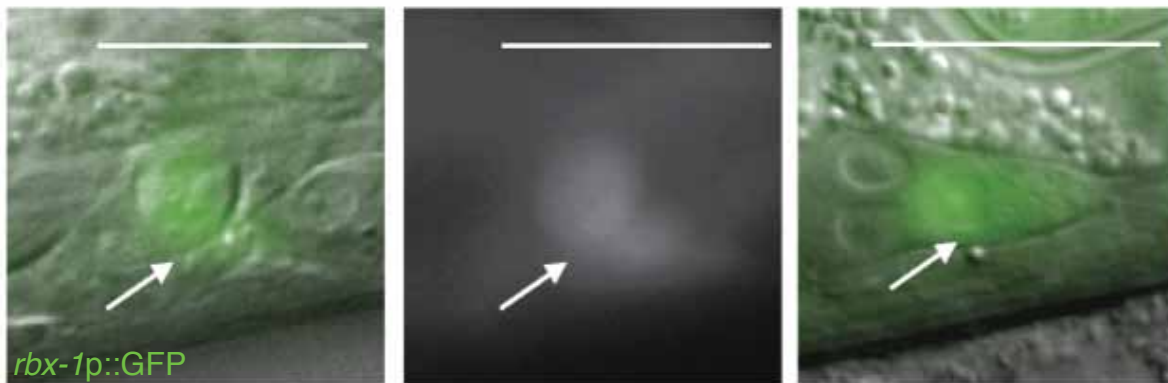

C

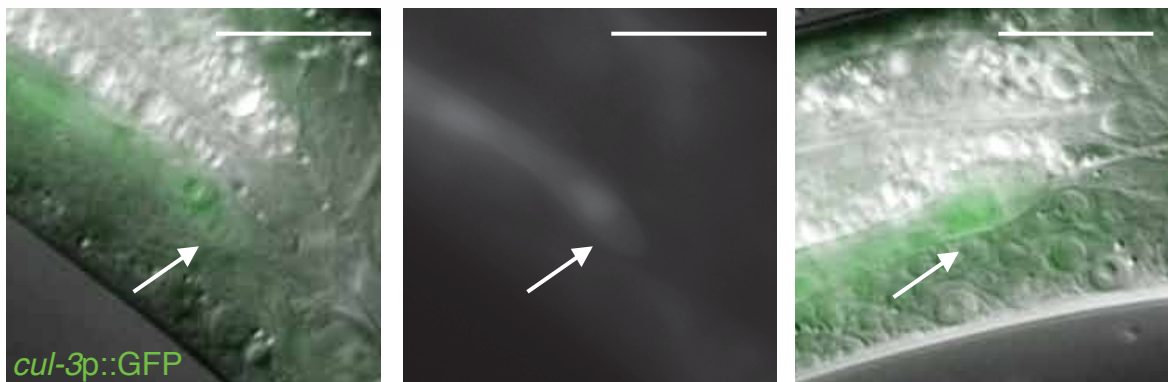

Supplement: supp [file elife-12821-supp-v1.zip]

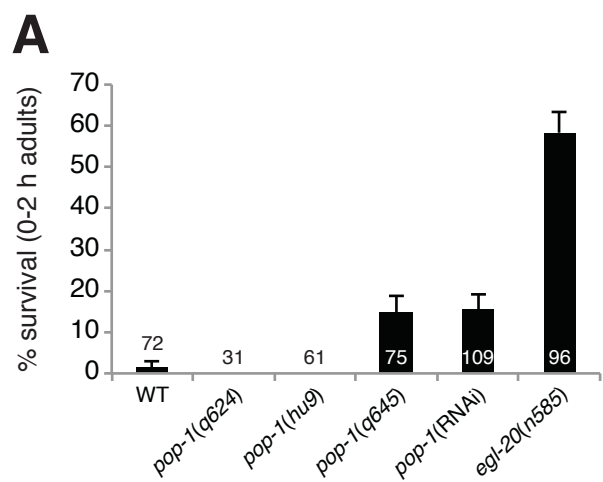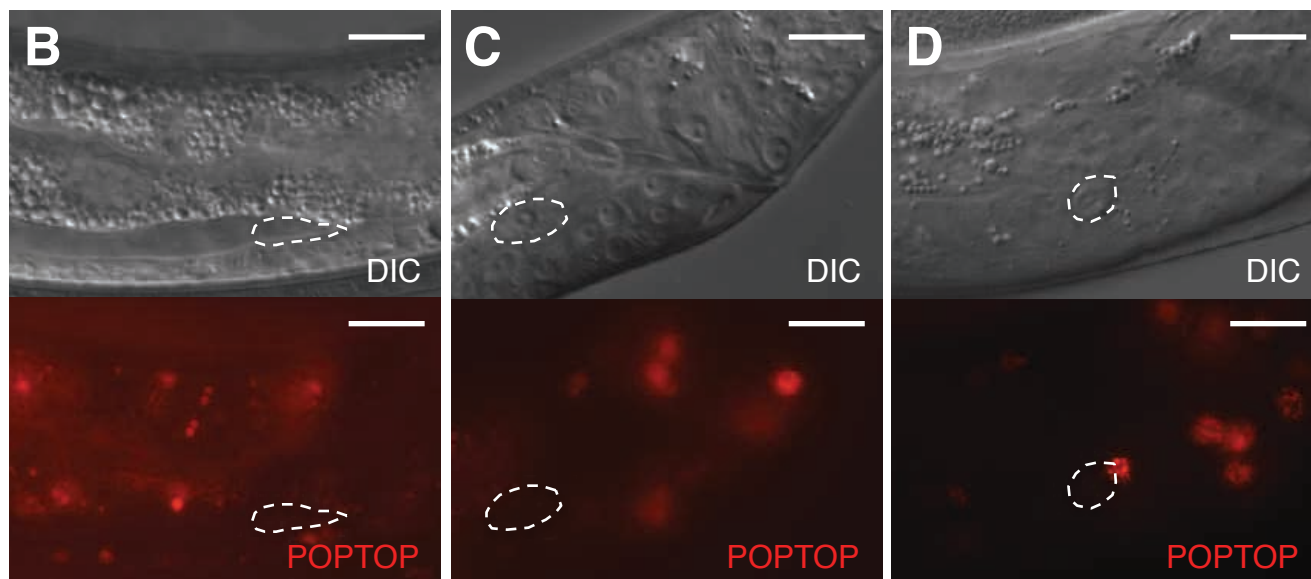

Supplement: supp [file elife-12821-supp-v1.zip]
